# Supplementary material for: Effects of Temperature, Metal Ions and Biosurfactants on Interaction Mechanism between Caffeic Acid Phenethyl Ester and Hemoglobin
Source: MDPI journal article supplement (doi:10.3390/molecules28083440), 2023-04-13
Supplement: s1 [file s1]

**Supporting Information**

**For**

**Effects of Temperature, Metal Ions and Biosurfactants on  
Interaction Mechanism between Caffeic Acid Phenethyl Ester  
and Hemoglobin**

Yutong Li<sup>1</sup>, Zhen Zhao<sup>2</sup>, Xiao Nai<sup>1</sup>, Mingyuan Li<sup>1</sup>, Jing Kong<sup>1</sup>, Yanrong Chen<sup>1</sup>, Min Liu<sup>1</sup>, Qian Zhang<sup>1</sup>,  
Jie Liu<sup>1,\*</sup>, Hui Yan<sup>2,\*</sup>

<sup>1</sup>School of Chemistry and Chemical Engineering, Liaocheng University, Liaocheng 252059, China

<sup>2</sup>College of Pharmacy, Liaocheng University, Liaocheng 252059, China

\*Corresponding authors. Tel.: +86 635 8230614, *E-mail address*: liujielcu@126.com (J. Liu) or  
yanhui@lcu.edu.cn (H. Yan)

**Table S1.** For the Hb and CAPE/NaC/NaDC system, the amino acid residues lining the binding site in Hb cavity, the hydrogen bonds, and the lowest binding energy.

| Protein PDB                                   | Small molecule | Surrounding amino acid residues                                                                                                                                          | Hydrogen bonds                                                                                                           | The lowest binding energy |
|-----------------------------------------------|----------------|--------------------------------------------------------------------------------------------------------------------------------------------------------------------------|--------------------------------------------------------------------------------------------------------------------------|---------------------------|
| carbonmonoxy liganded bovine Hb 1G09 (pH 7.2) | CAPE           | THR134, THR137, LYS104, LYS99, SER133, ASN108, TYR35, HIS103, LEU105, ASP126, VAL96, ALA130, PRO95, PHE98, LEU129, SER102, LEU106                                        | ASN108 (1.90 Å and 2.11 Å)<br>HIS103 (2.71 Å)<br>SER133 (1.65 Å)                                                         | -32.3 kJ/mol              |
|                                               | NaC            | LYS99, PHE98, THR137, SER133, THR134, TYF140, SER138, VAL1, LYS139, AGR141, ASN131, LYS127, ALA130, VAL34, PRO36, TRP37<br>PRO35, VAL135                                 | THR137 (1.73 Å)<br>THR134 (2.16 Å)<br>TYR140 (1.66 Å)<br>SER138 (1.86 Å)<br>LYS99 (1.73 Å and 1.92 Å)                    | -40.9 kJ/mol              |
|                                               | NaDC           | LYS99, PHE98, THR137, SER133, THR134, TYP140, SER138, VAL1, LYS139, APG141, ASN131, LYS127, ALA130, VAL34, PRO36, TRP37<br>PRO95                                         | THR137 (1.87 Å)<br>THR134 (2.27 Å)<br>TYR140 (1.62 Å)<br>SER138 (1.87 Å)<br>LYS99 (1.73 Å and 1.96 Å)                    | -41.1 kJ/mol              |
| bovine deoxy Hb 1HDA                          | CAPE           | VAL112, VAL109, HIS122, ASN108, LEU105, TRY35, ASP126, ALA130, LYS99, THR134, THR137, PRO95, SER133, VAL96, SER102, LEU129, LEU100, HIS103, LEU106                       | HIS103 (2.47 Å)<br>TYR35 (2.13 Å)<br>SER102 (1.82 Å)<br>SER133 (1.79 Å)                                                  | -36.4 kJ/mol              |
|                                               | NaC            | LYS99, ALA130, SER133, THR134, PRO95, THR137, SER138, TRY140, LYS139, TRP37, ARG141, LYS127, ALA130, VAL1                                                                | THR134 (2.16 Å)<br>THR137 (2.10 Å)<br>TYR140 (2.37 Å)<br>SER138 (2.72 Å)<br>ARG141 (1.67 Å)<br>LYS99 (1.61 Å)            | -41.1 kJ/mol              |
|                                               | NaDC           | LYS99, ALA130, SER133, THR134, PRO95, THR137, SER138, TRY140, LYS139, TRP37, ARG141, LYS127, ALA130, VAL1                                                                | THR134 (2.51 Å)<br>THR137 (2.21 Å)<br>TYR140 (1.91 Å)<br>SER138 (2.92 Å)<br>ARG141 (1.74 Å)<br>LYS99 (1.79 Å and 1.74 Å) | -41.9 kJ/mol              |
| CO form of bovine Hb 6II1                     | CAPE           | TRY145, ALA135, LYS132, VAL133, LEU3, LEU78, LEU81, GLY136, ASP79, ASP80, GLY83, LYS82, ALA140, ASN139, HIS146                                                           | LEU78 (2.11 Å)<br>ASP79 (2.85 Å)<br>LEU81 (2.12 Å)<br>LYS82 (1.80 Å)<br>HIS146 (1.84 Å)                                  | -35.2 kJ/mol              |
|                                               | NaC            | LYS104, VAL96, PRO100, ASP99, TRY145, THR38, LEU100, PHE36, ALA135, ALA138<br>PHE103, LYS99, THR39, PRO37, LYS132, SER35, GLN131, HIS103, VAL134, ASN108, GLY107, LEU105 | SER35 (1.99 Å)<br>THR38 (2.00 Å)<br>ASN108 (2.10 Å)                                                                      | -41.0 kJ/mol              |
|                                               | NaDC           | LYS104, VAL96, PRO100, ASP99, TRY145, THR38, LEU100, PHE36, ALA135, ALA138<br>HIS146, ASN139, ALA142, ASN97, LYS104                                                      | ASP99 (1.84 Å)<br>LYS104 (1.75 Å and 1.75 Å)                                                                             | -41.4 kJ/mol              |
| carbonmonoxy liganded bovine Hb 1G08 (pH 5.0) | CAPE           | GLN39, TRP37, PRO36, HIS89, LAA88, TYR140, THR137, LYS139, SER138, LYS127, ALA123, AGR141, SER124, ALA120, VAL34, PRO119, ALA51, THR50, VAL33, SER49, LEU48              | LYS127 (2.189 Å)<br>SER108 (1.985 Å)<br>TYR140 (2.36 Å)                                                                  | -36.0 kJ/mol              |

|                                                           |      |                                                                                                                                                  |                                                                                                             |              |
|-----------------------------------------------------------|------|--------------------------------------------------------------------------------------------------------------------------------------------------|-------------------------------------------------------------------------------------------------------------|--------------|
|                                                           | NaC  | VAL1, LEU2, ASN131, LYS127, ASP126,<br>ALA123, VAL34, VAL33, PRO36,<br>TYR140, SER138, LYS139<br>THR134, ALA130, TYR35, TRP37,<br>TRY140, THR134 | THR137 (2.16 Å)<br>SER138 (2.97 Å)<br>VAL34 (2.09 Å)<br>VAL1 (1.87 Å)<br>LYS127 (1.92 Å)<br>ASN131 (2.03 Å) | -40.2 kJ/mol |
|                                                           | NaDC | VAL1, LEU2, ASN131, LYS127, ASP126,<br>ALA123, VAL34, VAL33, PRO36,<br>TYR140, SER138, LYS139<br>AGR141, SER124, ASP6, SER3, PHE128              | SER138 (2.46 Å)<br>ALA123 (2.13 Å)<br>VAL1 (2.20 Å)<br>LYS127 (1.72 Å)                                      | -41.3 kJ/mol |
| carbonmonoxy<br>liganded<br>bovine Hb<br>1G0A<br>(pH 8.5) | CAPE | VAL1, SER3, LYS127, ASP6, ALA5,<br>GLY8, SER124, ASN9, VAL121,<br>ALA120, PRO119, ALA123, VAL33,<br>VAL34, PRO36, TRP37, LYS139,<br>TYR140       | ASP6 (1.81 Å)<br>ASN9 (2.68 Å)<br>ALA120 (2.25 Å)<br>SER124 (1.95 Å)<br>LYS139 (1.95 Å)<br>LYS127 (1.90 Å)  | -38.8 kJ/mol |
|                                                           | NaC  | VAL1, THR134, SER138, PRO77, LEU2,<br>LYS7, ASP74, LEU73, ASP75, LEU76,<br>VAL135, ASN131<br>SER3, ALA4, TYR140                                  | LEU2 2.00 Å)<br>LYS7 (1.89 Å)<br>LEU73 (2.37 Å)<br>ASN131 (2.12 Å)<br>VAL1 (1.90 Å)                         | -41.7 kJ/mol |
|                                                           | NaDC | VAL1, THR134, SER138, PRO77,<br>LEU2, LYS7, ASP74, LEU73, ASP75,<br>LEU76, VAL135, ASN131                                                        | LYS7 (1.95 Å)<br>ASP74 (1.93 Å)<br>ASN131 (2.09 Å)                                                          | -42.3 kJ/mo  |

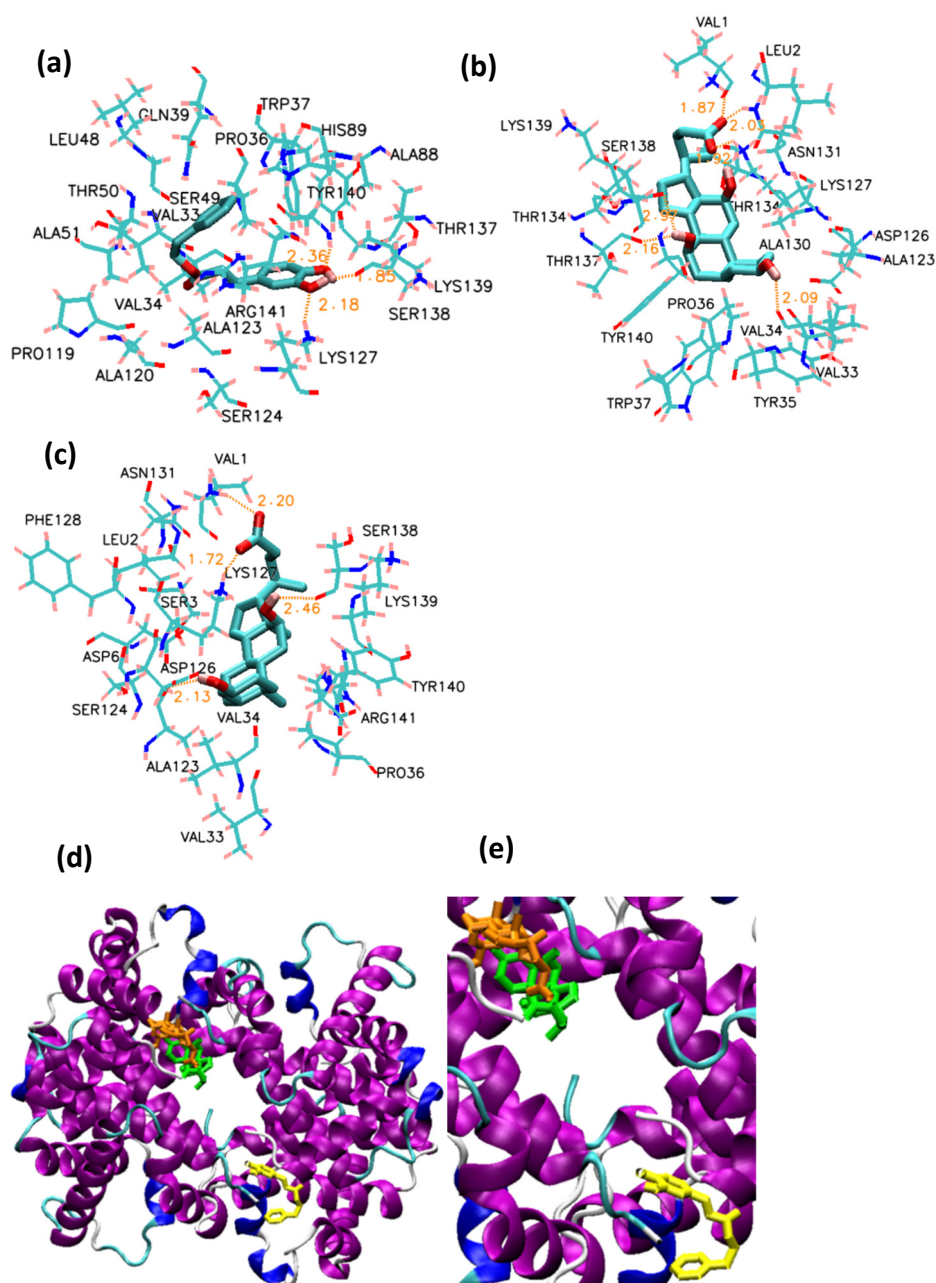

**Figure S1.** (a) CAPE and its surrounding amino acid residues for CAPE-Hb system; (b) NaC and its surrounding amino acid residues for NaC-Hb system; (c) NaDC and its surrounding amino acid residues for NaDC-Hb system; (d) The whole simulation diagram of Hb docking with CAPE, NaC and NaDC; (e) Partial enlargement of the Figure S1d. The spiral is the carbonmonoxy liganded bovine Hb (PDB: 1G08 at pH 5.0), the yellow rod is CAPE, the green rod is NaC, and the orange rod is NaDC.

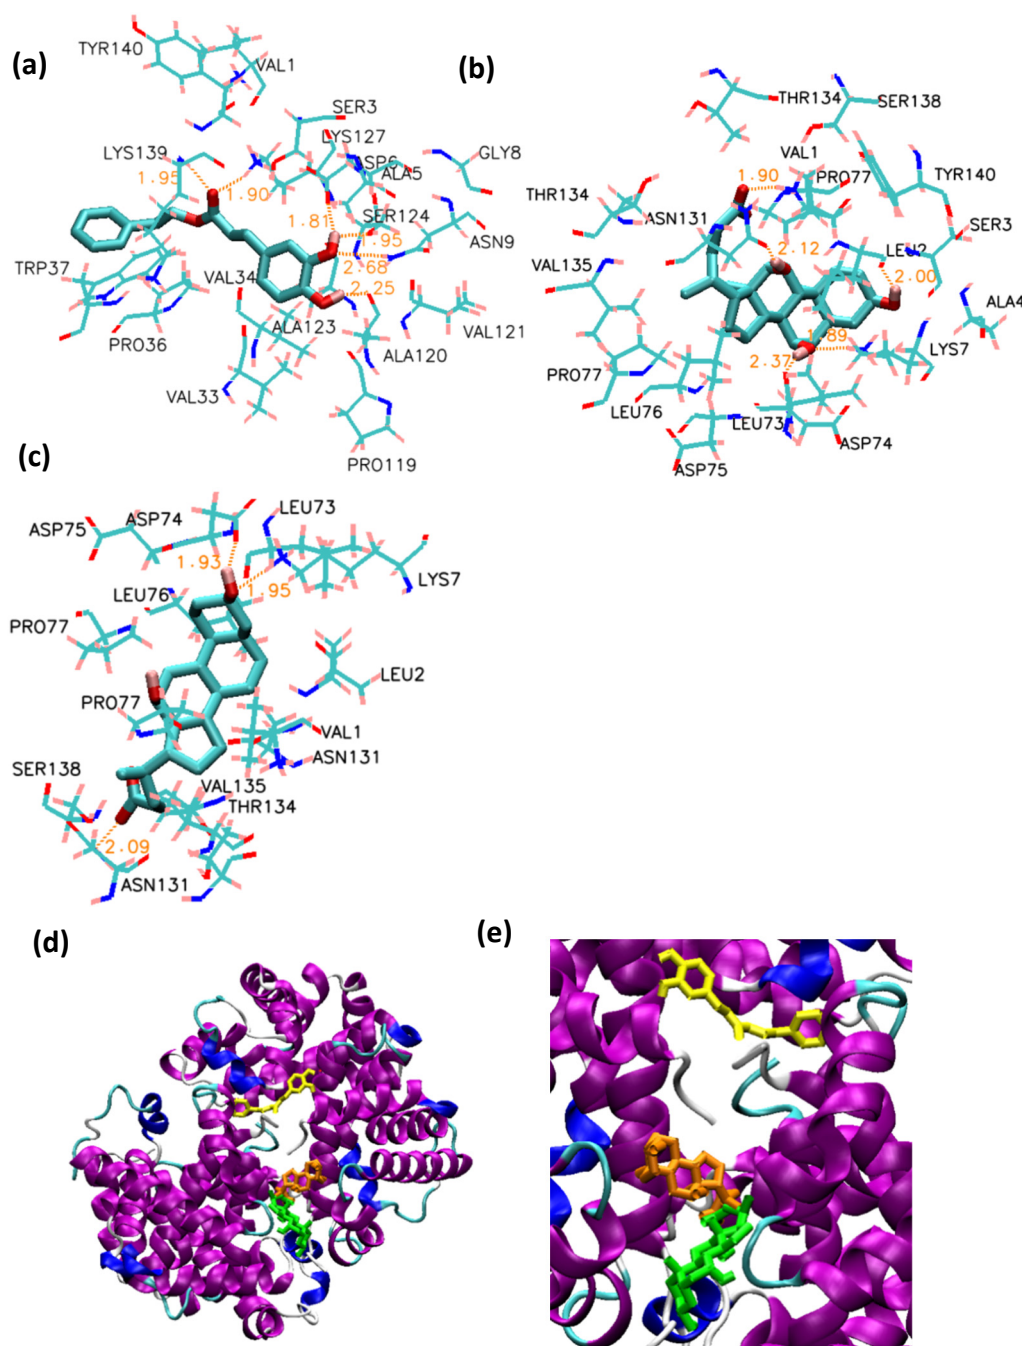

**Figure S2.** (a) CAPE and its surrounding amino acid residues for CAPE-Hb system; (b) NaC and its surrounding amino acid residues for NaC-Hb system; (c) NaDC and its surrounding amino acid residues for NaDC-Hb system; (d) The whole simulation diagram of Hb docking with CAPE, NaC and NaDC; (e) Partial enlargement of the Figure S2d. The spiral is the carbonmonoxy liganded bovine Hb (PDB: 1G0A at pH 8.5), the yellow rod is CAPE, the green rod is NaC, and the orange rod is NaDC.

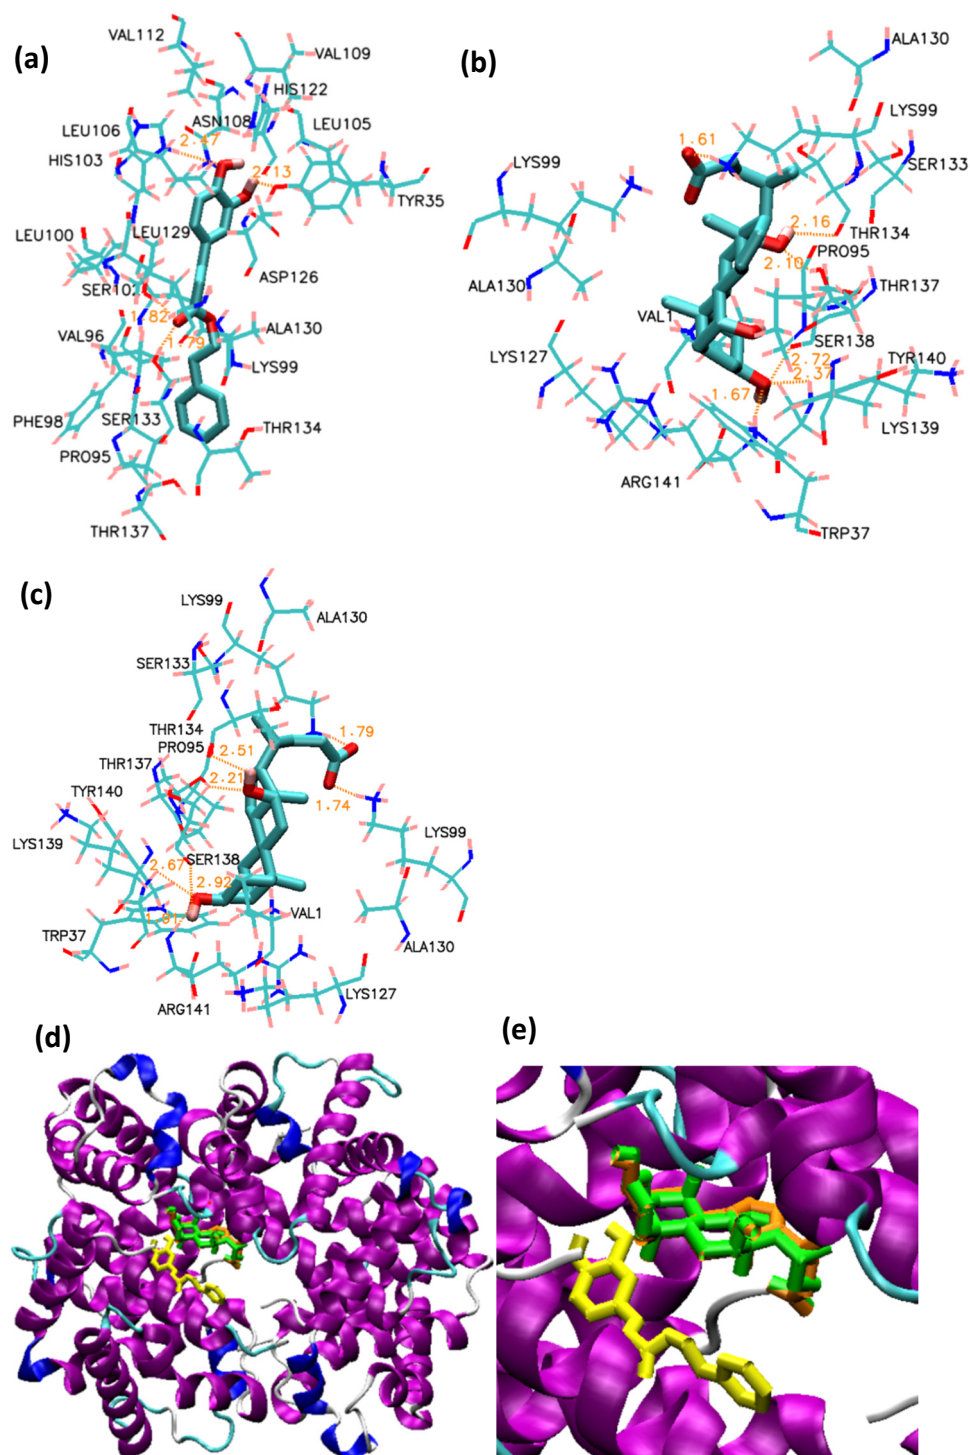

**Figure S3.** (a) CAPE and its surrounding amino acid residues for CAPE-Hb system; (b) NaC and its surrounding amino acid residues for NaC-Hb system; (c) NaDC and its surrounding amino acid residues for NaDC-Hb system; (d) The whole simulation diagram of Hb docking with CAPE, NaC and NaDC; (e) Partial enlargement of the Figure S3d. The spiral is the bovine deoxy Hb (PDB ID: 1HDA), the yellow rod is CAPE, the green rod is NaC, and the orange rod is NaDC.



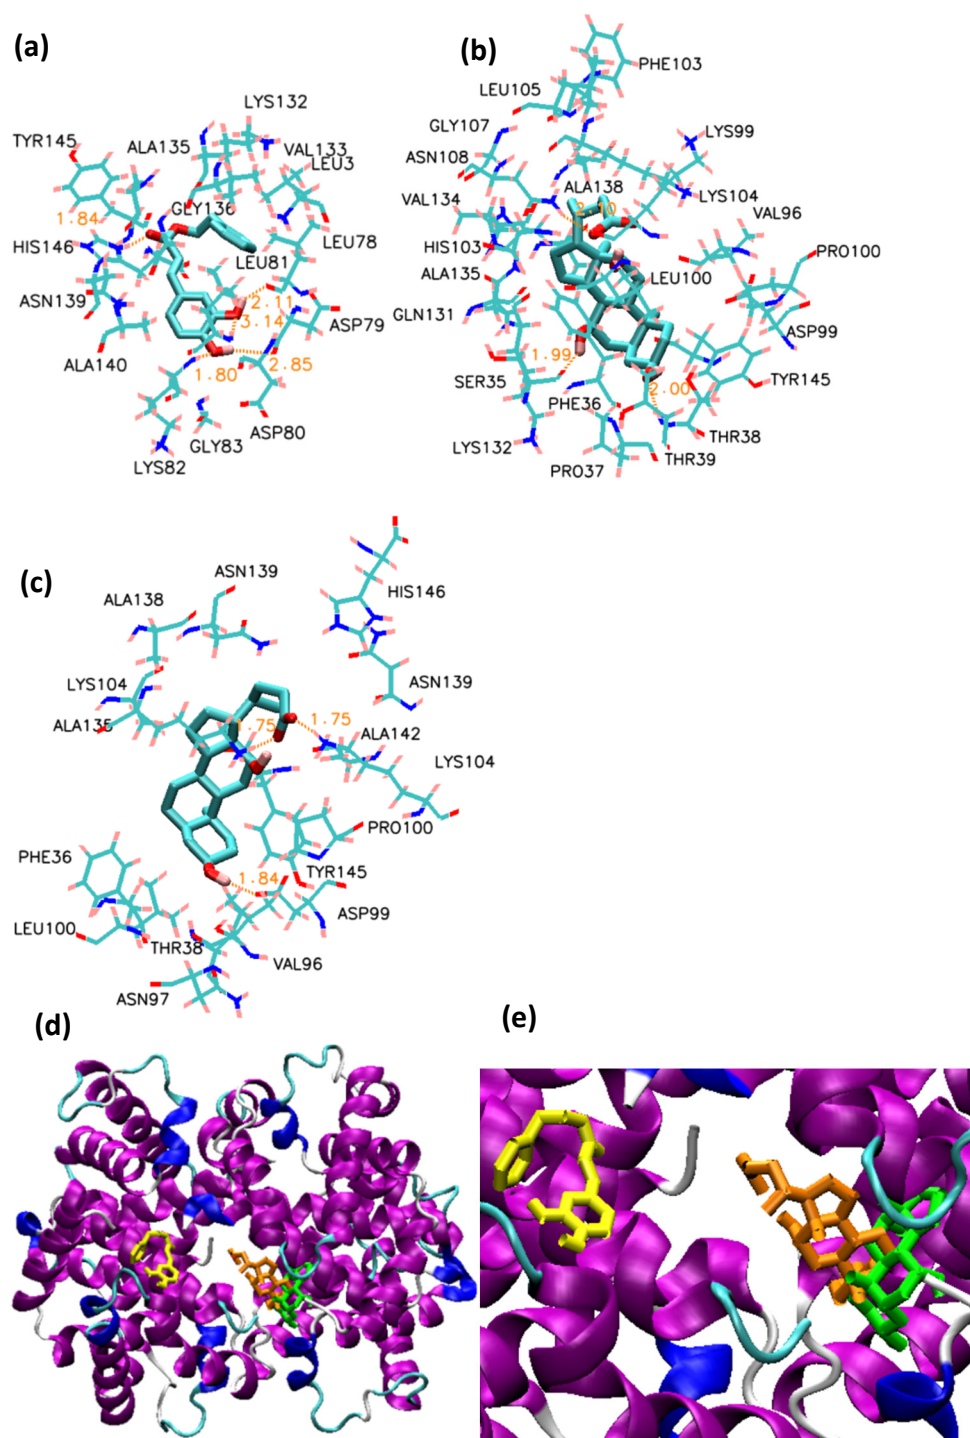

**Figure S4.** (a) CAPE and its surrounding amino acid residues for CAPE-Hb system; (b) NaC and its surrounding amino acid residues for NaC-Hb system; (c) NaDC and its surrounding amino acid residues for NaDC-Hb system; (d) The whole simulation diagram of Hb docking with CAPE, NaC and NaDC; (e) Partial enlargement of the Figure S4d. The spiral is the CO form of bovine Hb (PDB ID: 6II1), the yellow rod is CAPE, the green rod is NaC, and the orange rod is NaDC.

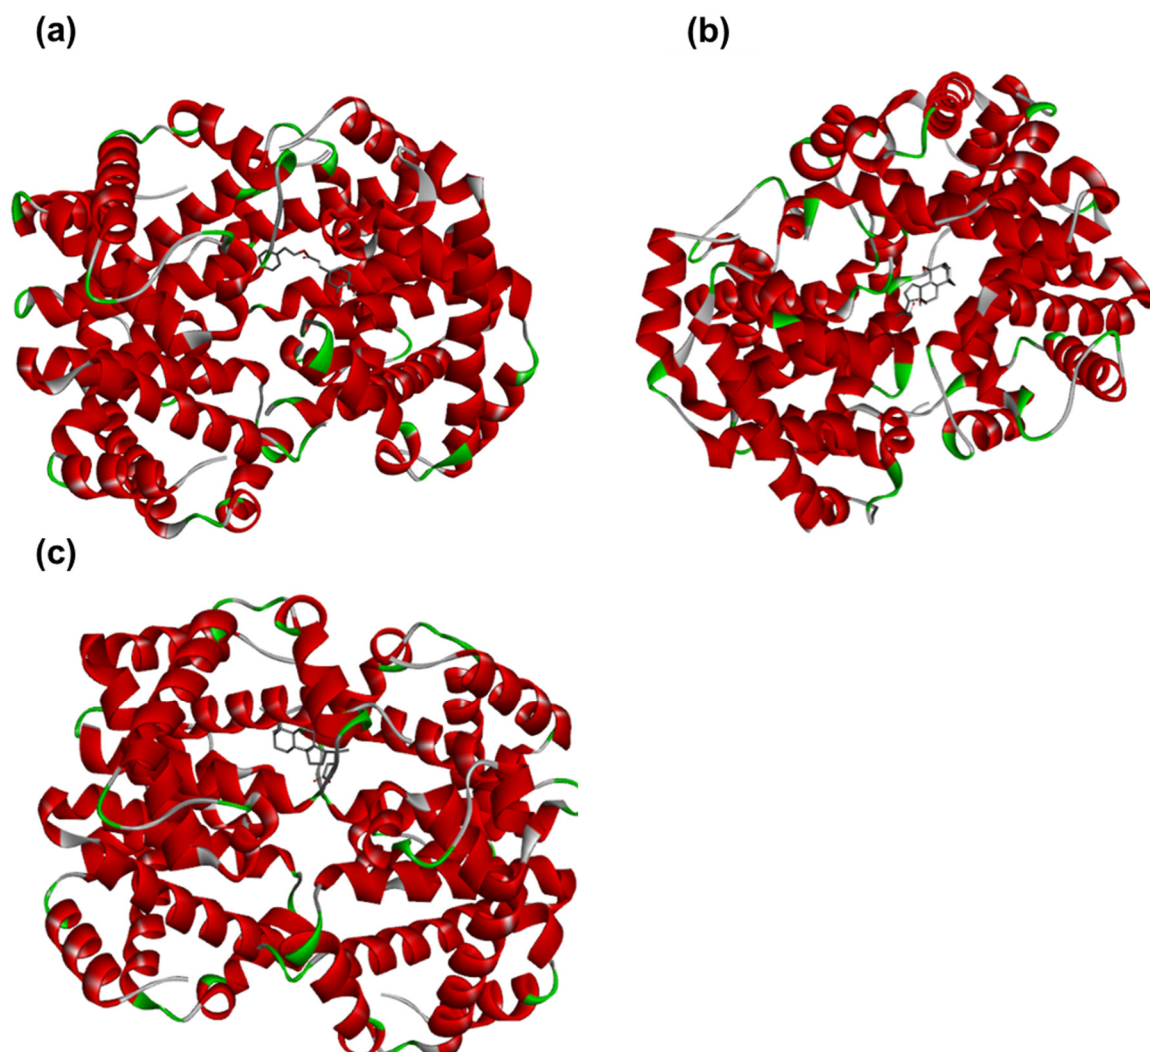

**Figure S5.** (a) Simulation diagram of molecular docking between Hb and CAPE; (b) Simulation diagram of molecular docking between Hb and NaC; (c) Simulation diagram of molecular docking between Hb and NaDC.
